# Supplementary material
Source: publisher figshare collection journal article supplement (https://gsapubs.figshare.com/ndownloader/files/23294429)
Supplement: Supplementary file 1 [file 23294429]

GSA Data Repository Item 2012300

***Geomorphological analysis of coastal depositional systems in SE Brazil aided by Google Earth coupled with the integration of chronological and sedimentological data by means of a Google fusion table***

André Zular, Carlos C.F. Guedes, Vinícius R. Mendes, André O. Sawakuchi, Paulo C.F. Giannini, Ana P.B. Tanaka, Milene Fornari, Daniel R. Nascimento Jr.

doi:10.1130/2012.2492(08)

(*in* Special Paper 492: *Google Earth and Virtual Visualizations in Geoscience Education and Research*, edited by Steven J. Whitmeyer, John E. Bailey, Declan G. De Paor, and Tina Ornduff)

APPENDIX

Supplementary KML Code

<div class='googft-info-window' style='font-family: sans-serif'>

Location:<b> {Location}</b><br>

Sample:<b> {Sample}</b><br>

<br>

UTM Zone:<b> {UTM Zone}</b><br>

UTM X:<b> {UTM X}</b><br>

UTM Y:<b> {UTM Y}</b><br><br>

Latitude:<b> {Latitude}</b><br>

Longitude:<b> {Longitude}</b><br><br>

<b>{Comments}</b><br><br>

Articles:<b> {Articles}</b><br>

Distance from coastline (m):<b> {Distance from coastline (m)}</b><br>

Elevation above RSL (m):<b> {Elevation above RSL (m)}</b><br>

Landform:<b> {Landform}</b> Landform Unit:<b> {Landform Unit}</b><br>

Age (ys):<b> {Age (years)} ± {Age standard error (years)}</b> Method: <b> {Age determination method}</b><br>

<a href={OSL data analysis link}>OSL data table</a>

<br><br><br></div>

<img src="{Image 1}" width="450"/><p>

<b>{Comments Image 1}</b><br></p>

<img src="{Image 2}" width="450"/><p>

<b>{Comments Image 2}</b><br></p>

<img src="{Image 3}" width="450"/><p>

<b>{Comments Image 3}</b><br></p>

<img src="{Image 4}" width="450"/><p>

<b>{Comments Image 4}</b><br></p><br>

<img src="http://chart.apis.google.com/chart?chxl=0:|Very Coarse|Coarse|Medium|Fine|Very Fine&chxp=0,95,75,55,35,15&chxs=0,000000,11.5,0,lt,000000&chxt=y,x&chbh=a&chs=300x150&cht=bhg&chco=FFCC33,3D7930&chd=t:10,50,60,80,40|-1&chg=5,5&chtt= Sand grain-size (%)&chd=t:{Grain-size / Very Coarse Sand (%)},{Grain-size / Coarse Sand (%)},{Grain-size / Medium Sand (%)},{Grain-size / Fine Sand (%)},{Grain-size / Very Fine Sand (%)}&chts=000000,17" width="300" height="150" alt="Sand grain-size" /><br><br>

Mean Diameter:<b> {Grain-size / Mean Diameter}</b> Phi<br>

Standard Deviation:<b> {Grain-size / Standard deviation}</b> Phi<br>

Skewness:<b> {Grain-size / Skewness}</b> Phi<br>

Kurtosis:<b> {Grain-size / Kurtosis}</b> Phi<br>

<br><br><br>

<i>Overlay</i> <br>

<a href={Overlay 1}>{Overlay 1 Description}</a>

<br><br><p>

<i>Overlay</i> <br>

<a href={Overlay 2}>{Overlay 2 Description}</a>

<br><br><p>

<i>Overlay</i> <br>

<a href={Overlay 3}>{Overlay 3 Description}</a>

<br><br><p><br><p>

<a href={HM table link}>Heavy minerals table</a>

<br><p><br>

<img src="http://chart.apis.google.com/chart?chs=300x150&cht=p&chco=BBCCED,3366CC&chds=0,260&chd=t:40,160|=&chl=Opaques|Non Opaques&chtt= Heavy Minerals Opaques/Non-Opaques

&chd=t:{Heavy Minerals / Opaques},{Heavy Minerals / Non-Opaques}

&chts=000000,13" width="300" height="150" alt="Heavy Minerals - Opaques" />

<br><br><br><br>

Total Non-Opaque Heavy Minerals Count: <b>{Heavy Minerals / Total no opaques}</b><br><br>

<img src="http://chart.apis.google.com/chart?chf=a,s,000000&chs=300x400&cht=p3&chco=7777CC|FFB479|94B9CC|262A44|80C65A|00E800|FFFF88|FF0000|BBCCED|0000FF|FF9900|49188F|C2BDDD|656565|990066|612EEF|C35EFF|FF1488|EA5114|000000,FF9900&chd=s:UffaBBCCDEEFFGHHIJJK,

&chd=t:{Heavy Minerals / Zircon},{Heavy Minerals / Tourmaline},{Heavy Minerals / Rutile},{Heavy Minerals / Hornblende},{Heavy Minerals / Epidote},{Heavy Minerals / Sillimanite},{Heavy Minerals / Kyanite},{Heavy Minerals / Staurolite},{Heavy Minerals / Apatite},{Heavy Minerals / Clinozoisite},{Heavy Minerals / Tremolite},{Heavy Minerals / Andaluzite},{Heavy Minerals / Actinolite},{Heavy Minerals / Enstatite},{Heavy Minerals / Monazite},{Heavy Minerals / Hypersthene},{Heavy Minerals / Diopside},{Heavy Minerals / Garnet},{Heavy Minerals / Topaz},{Heavy Minerals / Altered Minerals}

&chdl= Zircon|Tourmaline|Rutile|Hornblende|Epidote|Sillimanite|Kyanite|Staurolite|Apatite|Clinozoisite|Tremolite|Andaluzite|Actinolite|Enstatite|Monazite|Hypersthene|Diopside|Garnet|Topaz|Altered

&chdlp=b&chma=|5&chtt= &chts=030303,10.667" width="300" height="400" alt="Heavy Minerals - Total count >=200"

/><br><p><p>

<img src="http://chart.apis.google.com/chart?chs=300x150&cht=p3&chco=7777CC|76A4FB|3399CC|3366CC&chd=s:sh&chdl=Ru|Zi

&chd=t:{Heavy Minerals / Ru dedicated count Zi + Ru},{Heavy Minerals / Zi dedicated count Zi + Ru}

&chtt=Heavy+Minerals+ratio+Ru-Zi" width="300" height="150" alt="Heavy Minerals ratio Ru-Zi" /><br>

<img src="http://chart.apis.google.com/chart?chs=300x150&cht=p3&chco=80C65A|3399CC|3366CC&chd=s:sh&chdl=Zi|Tu

&chd=t:{Heavy Minerals / Zi dedicated count Zi + Tu},{Heavy Minerals / Tu dedicated count Zi + Tu}

&chma=|2&chtt=Heavy+Minerals+ratio+Zi-Tu" width="300" height="150" alt="Heavy Minerals ratio Zi-Tu" /><br>

<img src="http://chart.apis.google.com/chart?chs=300x150&cht=p3&chco=FF5994|3399CC|3366CC&chd=s:sh&chdl=Tu|Hn

&chd=t:{Heavy Minerals / Tu dedicated count Tu + Hn},{Heavy Minerals / Hn dedicated count Tu + Hn}

&chma=|2&chtt=Heavy+Minerals+ratio+Tu-Hn" width="300" height="150" alt="Heavy Minerals ratio Tu-Hn" />
